# Supplementary material
Source: PubMed Central journal article supplement (PMC3793301)
Supplement: NIHMS54222-supplement-supporting_info.pdf [file NIHMS54222-supplement-supporting_info.pdf]

## SUPPLEMENATARY FIGURES

### **FIGURE S1 Southern blot analysis of *T. brucei* genomic DNA, using *TbINO1***

**ORF as a probe.** The genomic DNA was digested with several restriction enzymes and analysed by Southern blotting using a fluorescein labelled *INO1* ORF as the probe, as described in Experimental Procedures. Lane 1. *NcoI*, Lane 2. *SpeI*, Lane 3. *AfIII/SacII*, Lane 4. *EcoRV*. Shown below the autoradiogram is a schematic of the predicted restriction enzyme cut sites within the *INO1* ORF and adjacent UTR's. NB. There was no restriction site predicted within the ORF or adjacent UTR's for *SpeI*.

**FIGURE S2 Deamination of lipid samples from *in vivo* labelling.** Cells were labelled with [<sup>3</sup>H]-glucose (Lanes 1 and 2) or [<sup>3</sup>H]-mannose (Lane 3), lipids extracted and an aliquot of these lipids analysed by HPTLC (Lane 1 and 3 respectively) as detailed in Experimental Procedures. Lipids from each labelling were also subjected to deamination and butanol water partitioning, the resulting lipid products from the [<sup>3</sup>H]-glucose labelling sample were analysed by HPTLC (Lane 2). NB. As scintillation counting of the butanol and aqueous fractions from the deamination of lipids from the [<sup>3</sup>H]-mannose labelling (see Supplementary Data Table 1) showed that there was no [<sup>3</sup>H]-lipid reaction products present, therefore HPTLC of the butanol phase was not performed.

### **FIGURE S3 sVSG and deglycosylation analysis of samples from *in vivo* labelling.**

Panel A, cells were labelled with [<sup>3</sup>H]-glucose and sVSG isolated. This sVSG was deglycosylated with PNGaseF, proteins were separated on SDS-PAGE and detected

by coomassie staining (Lanes 1 and 2) or fluorography (Lanes 3 and 4). Lanes 1 and 3 show undeglycosylated sVSG, Lanes 2 and 4 show deglycosylated sVSG. Panel B, wild type cells were labelled in the presence of tunicamycin and the proteins separated by SDS-PAGE. Detection was either by coomassie blue staining (Panel B) or by fluorography (Panel C). Lane 1, [ $^3\text{H}$ ]-mannose pulse labelling, Lane 2 [ $^3\text{H}$ ]-mannose pulse-chase labelling, Lane 3, [ $^3\text{H}$ ]-glucose pulse labelling, Lane 4, [ $^3\text{H}$ ]-glucose pulse-chase labelling

**FIGURE S4 Analysis of exchange reaction with GPI-VSG as substrate.** Cells were labelled with either [ $^3\text{H}$ ]-mannose, [ $^3\text{H}$ ]-glucose or [ $^3\text{H}$ ]-myristate in the presence or absence of cycloheximide. Proteins were separated by SDS-PAGE, proteins were detected by coomassie blue staining (Lanes 1 to 6), labelled proteins detected by fluorography (Lanes 7 to 12). Lane 1 and 7, [ $^3\text{H}$ ]-mannose labelling without cycloheximide; Lane 2 and 8, [ $^3\text{H}$ ]-mannose labelling with cycloheximide; Lane 3 and 9, [ $^3\text{H}$ ]-glucose labelling without cycloheximide; Lane 4 and 10, [ $^3\text{H}$ ]-glucose labelling with cycloheximide; Lane 5 and 11 [ $^3\text{H}$ ]-myristate labelling without cycloheximide; Lane 6 and 12, [ $^3\text{H}$ ]-myristate labelling with cycloheximide.

|         | Deamination |         | Negative |         |
|---------|-------------|---------|----------|---------|
|         | Butanol     | Aqueous | Butanol  | aqueous |
| Mannose | 7           | 93      | 94       | 6       |
| Glucose | 96          | 4       | 92       | 8       |

**Table S1 Deamination of lipid samples from *in vivo* labelling.** Cells were labelled with [<sup>3</sup>H]-glucose or [<sup>3</sup>H]-mannose, lipids extracted, deaminated and subjected to butanol water partitioning. [<sup>3</sup>H]-Levels in the butanol and water phases were determined by scintillation spectrometry and are expressed as a percentage of the total cpm.

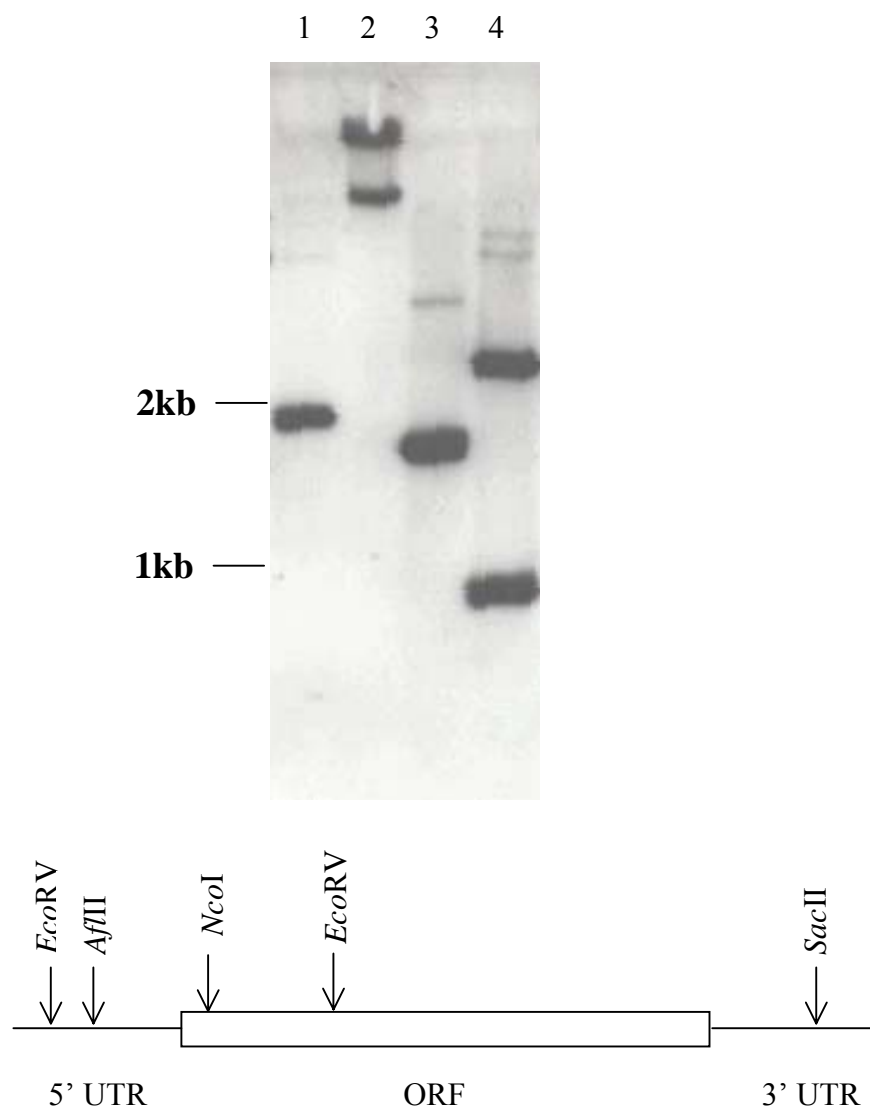

**Supplementary Figure 1**

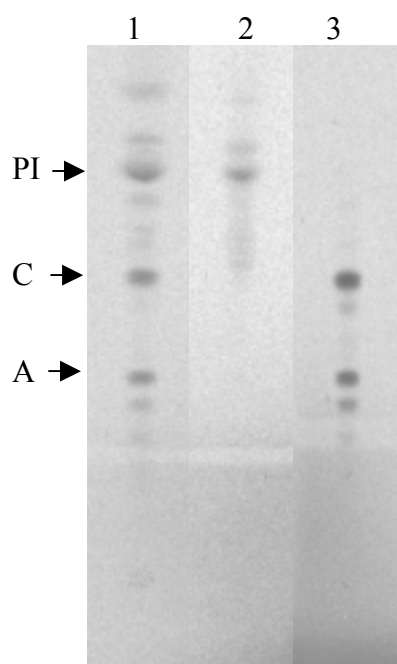

**Supplementary Figure 2**

A)

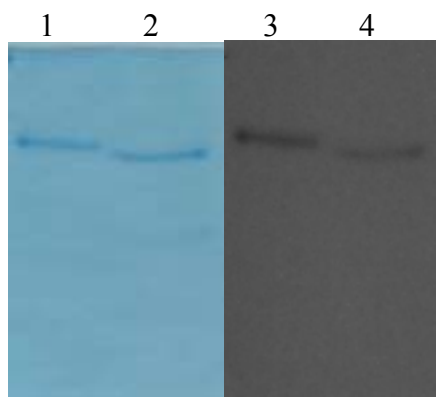

B)

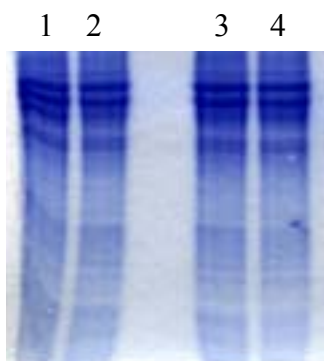

C)

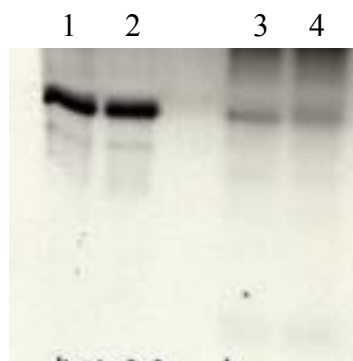

**Supplementary Figure 3**

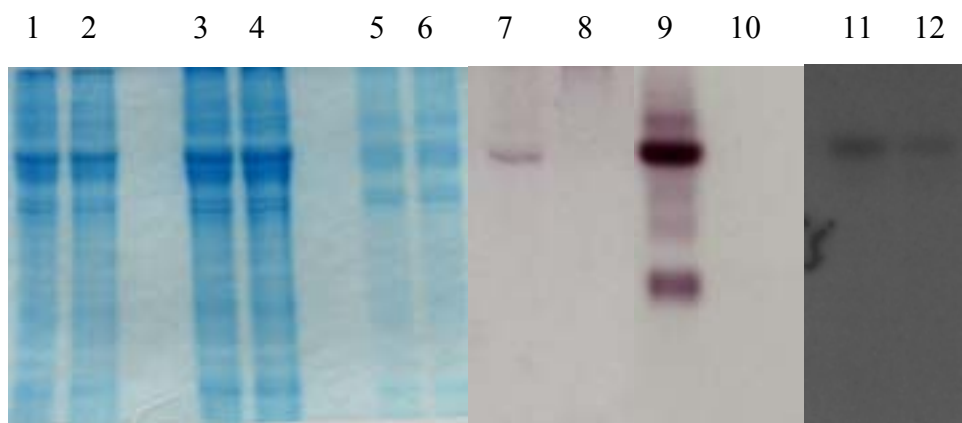

**Supplementary Figure 4**
